# Supplementary material
Source: PubMed Central journal article supplement (PMC5873238)
Supplement: ba016501-suppl1.pdf [file ba016501-suppl1.pdf]

# **MECOM associated syndrome - a heterogeneous inherited bone marrow failure syndrome with amegakaryocytic thrombocytopenia**

RUNNING HEAD: MECOM associated syndrome

Manuela Germeshausen, Phil Ancliff, Jaime Estrada, Markus Metzler, Eva Ponstingl, Horst Rüttschle, Dirk Schwabe, Richard H. Scott, Sule Unal, Angela Wawer, Bernward Zeller, Matthias Ballmaier

## **Supplemental Information**

**Supplemental Table 1:** Previously reported patients/families with germ line mutations in MECOM

**Supplemental Table 2:** Pathogenicity classification of variants according to the ACGM recommendations

**Supplemental Table 3:** Clinical characteristics of patients with MECOM variations of uncertain significance or predicted to be benign

**Supplemental Table 4:** THPO plasma levels

**References**

| Reference                           | Patient ID                 | Genomic (GRCh38.p7)<br>Variation     | Transcript variant 3 (NM_001105078.3) |                                    |                      | Phenotype |     |                                                                                             |                   |
|-------------------------------------|----------------------------|--------------------------------------|---------------------------------------|------------------------------------|----------------------|-----------|-----|---------------------------------------------------------------------------------------------|-------------------|
|                                     |                            |                                      | E/I no.                               | CDS/protein                        | Type                 | BMF       | RUS | other organ abnormalities                                                                   | familial/sporadic |
| Bluteau et al., 2017 <sup>1</sup>   | UB100                      | chr3:g.169116002_169116006del        | E7                                    | c.1302_1306del<br>p.Lys434fs       | frameshift           | Y         | N   | -                                                                                           | S                 |
| Bluteau et al., 2017 <sup>1</sup>   | UB093                      | chr3:g.169112870C>A                  | E8                                    | c.1930G>T<br>p.Glu644Ter           | nonsense             | Y         | N   | clubfoot, pulmonary stenosis, facial dysmorphism                                            | S                 |
| Bluteau et al., 2017 <sup>1</sup>   | UB153                      | chr3:169100963C>T                    | I10                                   | c.2208-1G>A<br>loss of splice site | splice site mutation | Y         | N   | thumb abnormalities, renal hypoplasia                                                       | S                 |
| Niihori et al., 2015; <sup>2</sup>  | TRS3                       | chr3:g.169100922G>A<br>(rs864309724) | E11                                   | c.2248C>T<br>p.Arg750Trp           | missense             | Y         | Y   | deafness, hydrocele testicle                                                                | S                 |
| Lord et al., 2017 <sup>3</sup>      | -                          | chr3:g.169100922G>A<br>(rs864309724) | E11                                   | c.2248C>T<br>p.Arg750Trp           | missense             | Y         | Y   | finger anomalies, facial dysmorphism, hip dysplasia, patent foramen ovale, nephrocalcinosis | S                 |
| Bluteau et al., 2017 <sup>1</sup>   | UB004                      | chr3:g.169100922G>A<br>(rs864309724) | E11                                   | c.2248C>T<br>p.Arg750Trp           | missense             | Y         | Y   | Tetralogy of Fallot                                                                         | S                 |
| Niihori et al., 2015 <sup>2</sup>   | TRS2                       | chr3:g.169100918T>C<br>(rs864309723) | E11                                   | c.2252A>G<br>p.His751Arg           | missense             | Y         | Y   | finger abnormalities, deafness, cleft palate, dysarthria                                    | S                 |
| Niihori et al., 2015 <sup>2</sup>   | TRS1                       | chr3:g.169100904T>C<br>(rs864309722) | E11                                   | c.2266A>G<br>p.Thr756Ala           | missense             | Y         | Y   | finger abnormalities                                                                        | S                 |
| Ripperger et al., 2017 <sup>4</sup> | I:1, II:3,<br>III:2, III:3 | chr3:g.169095235A>C                  | E12                                   | c.2296T>G<br>p.Cys766Gly           | missense             | Y/N       | Y   | finger abnormalities, deafness, MDS in 2 patients                                           | F                 |
| Bluteau et al., 2017 <sup>1</sup>   | UB036                      | chr3:g.169095197C>A                  | E12                                   | c.2334G>T<br>p.Arg778Ser           | missense             | Y         | N   | thumb abnormalities, myocardial atrophy                                                     | S                 |
| Bluteau et al., 2017 <sup>1</sup>   | UB104                      | chr3:169089116_169089119del          | E15                                   | c.2900_2903del                     | frameshift           | Y         | N   | -                                                                                           | S                 |

**Supplemental Table 1: Previously reported patients/families with germ line mutations in MECOM**

| Patient ID  | Genomic Variation<br>(refSNP)        | Type of Evidence |                                   |                 |                  |              |                |            | Pathogenicity          |
|-------------|--------------------------------------|------------------|-----------------------------------|-----------------|------------------|--------------|----------------|------------|------------------------|
|             |                                      | population data  | computational and predictive data | functional data | segregation data | de novo data | other database | other data |                        |
| P1          | chr3:g.169100919G>A                  | PM2              | PM5, PP3                          | PM1             |                  |              |                | PP4        | likely pathogenic (IV) |
| P2          | chr3:g.169100894T>A                  | PM2              | PP3                               | PM1             |                  |              |                | PP4        | likely pathogenic (V)  |
| P3          | chr3:g.169100892G>A                  | PM2              | PP3                               | PM1             |                  | PM6          |                | PP4        | likely pathogenic (IV) |
| P4          | chr3:g.169100962_<br>169100963delTC  | PM2              | PVS1                              | PM1             |                  | PM6          |                | PP4        | pathogenic (Ib)        |
| P5/P6       | chr3:g.169100922G>A<br>(rs864309724) | PM2              | PS1                               | PM1             |                  | PM6          | PP5            |            | pathogenic (IIIa)      |
| P7          | chr3:g.169093016G>A                  | PM2              | PVS1                              |                 |                  |              |                |            | likely pathogenic (I)  |
| P8          | chr3:g.169128041G>T                  | PM2              | PVS1                              |                 | BS4              |              |                |            | likely pathogenic (I)  |
| P9          | chr3:g.169095075C>G                  | PM2              | PVS1                              |                 |                  | PM6          |                |            | pathogenic (Ib)        |
| P10         | chr3:g.169116194G>A                  | PM2              | PVS1                              |                 |                  |              |                |            | likely pathogenic (I)  |
| P11         | chr3:g.169095111_<br>169095112insT   | PM2              | PVS1                              |                 |                  |              |                |            | likely pathogenic (I)  |
| P12         | chr3:g.169116402G>C                  | PM2              | PP3                               |                 |                  | PM6          |                | PP4        | likely pathogenic (V)  |
| P13         | chr3:g.169116402G>C                  | PM2              |                                   |                 | BS4              |              |                |            | uncertain significance |
| P14/P15     | chr3:g.169095082T>C<br>(rs200049869) | PS4              | BP4                               |                 | BS4 (P15)        |              |                |            | uncertain significance |
| P16/P17/P18 | chr3:g.169143748C>A<br>(rs116535717) | BS1              |                                   |                 | BS4 (P16)        |              |                |            | benign (II)            |
| P19         | chr3:g.169122674T>C<br>(rs34896995)  | BS1              | PP3                               |                 |                  |              |                |            | uncertain significance |
| P20         | chr3:g.169145034T>C<br>(rs370795924) | PM2              |                                   |                 |                  |              |                |            | uncertain significance |

### Supplemental Table 2: Pathogenicity classification of variants according to the ACGM recommendations<sup>5,6</sup>

The used abbreviations are from the ACGM recommendations and are organized according to the type of evidence (B: benign, P: pathogenic), strength of the criteria (VS: very strong, S: strong, M: moderate, P: supporting) and a number code: BS1: Allele frequency greater than expected for disorder; BS4: Lack of segregation in affected members of a family; BP4: Multiple lines of computational evidence suggest no impact on gene or gene product; PM1: Located in a mutational hot spot and/or critical and well-established; PM2: Absent from controls in Exome Sequencing Project, 1000 Genomes or ExAc; PM4: Protein length change; PM5: Novel missense mutation at AA position where a different missense change determined to be pathogenic has been seen before; PM6: Assumed *de novo*, but without confirmation of paternity and maternity; PP1: Co-segregation in multiple affected family members; PP3: Predicted deleterious effect; PP4: Phenotype highly specific for gene; PS1: Same amino acid change as a previously established pathogenic variant; PS4: Prevalence of variant in affected individuals significantly increased compared to controls; PVS1: Null variant, when loss of function is a known mechanism of disease; (for detailed explanation see Richards et al.<sup>5</sup>). Nucleotide numbering according to GRCh38.p7

| Pat ID | sex | hematological course                                                           | HSCT (age in months) | RUS | other skeletal malformations | other malformations          | hearing | B cell lymphopenia | other / remarks                                                                          | family history | MECOM mutation (transcript variant 3)                                   |
|--------|-----|--------------------------------------------------------------------------------|----------------------|-----|------------------------------|------------------------------|---------|--------------------|------------------------------------------------------------------------------------------|----------------|-------------------------------------------------------------------------|
| P13    | f   | congenital TP with reduced MKs, amelioration of TP in the first months of life | N                    | N   | N                            | N                            | ND      | ND                 |                                                                                          |                | c.906C>G<br>p.Ser302Arg                                                 |
| P14    | m   | TP since age 5y, leukopenia since age 17y                                      | N                    | N   | N                            | sinus bradycardia            | ND      | ND                 | fatigue                                                                                  |                | c.2449A>G<br>p.Met817Val                                                |
| P15    | m   | severe congenital TP, spontaneous normalization of platelet counts at age 10m  | N                    | N   | N                            | pelvy-calyceal dilation left | normal  | ND                 |                                                                                          | N              | c.2449A>G<br>p.Met817Val                                                |
| P16    | m   | TP reported since age 10y, hypocellular BM, progressive BMF at age 12y         | (192)                | N   | "stubby fingers"             | N                            | ND      | N                  | Café-au-lait spots on trunk, increased chromosomal breakage (borderline), FANCC mutation |                | 5'UTR (c.-105)<br><i>Transcript Variant 1:</i><br>c.88G>T<br>p.Ala30Ser |
| P17    | m   | diagnosis of AA at age 5y, successful treatment with immunosuppressive therapy | N                    | N   | N                            | N                            | ND      | ND                 | accelerated bone maturation (precocious puberty)                                         |                | 5'UTR (c.-105)<br><i>Transcript Variant 1:</i><br>c.88G>T<br>p.Ala30Ser |
| P18    | f   | development of pancytopenia development AML M0                                 | MFD (25)             | N   | N                            | N                            | ND      | N                  |                                                                                          | N              | 5'UTR (c.-105)<br><i>Transcript Variant 1:</i><br>c.88G>T<br>p.Ala30Ser |
| P19    | f   | isolated TP, normocellular bone marrow                                         | N                    | N   | N                            | N                            | normal  | N                  |                                                                                          | N              | c.320A>G<br>p.Gln107Arg                                                 |
| P20    | m   | congenital TP with reduced MKs, progressive BMF                                | UCB (48)             | N   | N                            | ASD II                       | normal  | ND                 |                                                                                          | N              | <i>Transcript Variant 1:</i><br>5'UTR (c.-35A>G)                        |

**Supplemental Table 3: Clinical characteristics of patients with MECOM variations of uncertain significance or predicted to be benign**

Abbreviations: AA: aplastic anemia; ASD: atrial septal defect; BMF: bone marrow failure; HSCT: hematopoietic stem cell transplantation; MFD: matched family donor; ND: no data; RUS: radio-ulnar synostosis; TP: thrombocytopenia; UCB: unrelated cord blood; HSCT outcome was positive in P16, P18 and P20.

| <b>Patient ID</b> | <b>age [y]</b> | <b>THPO [pg/mL]</b> |
|-------------------|----------------|---------------------|
| P1                | 0 2/12         | 3342 ±168           |
| P4                | 0 2/12         | >3500               |
| P4                | 0 5/12         | >3500               |
| P8                | 0 1/12         | 156 ±18             |
| P11               | 0 8/12         | 1126 ±58            |
| P11               | 0 9/12         | 1815 ±3             |
| P16               | 14 10/12       | 585 ±322            |
| P19               | 5 4/12         | 58 ±6               |
| P20               | 3 0/12         | 734 ±31             |

**Supplemental Table 4: THPO plasma levels**

as determined by means of ELISA; reference value: median <32 pg/mL, range ND - 196 pg/ml

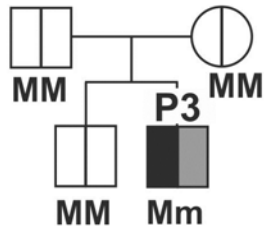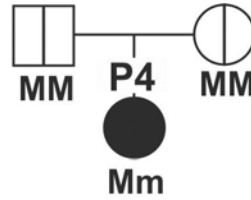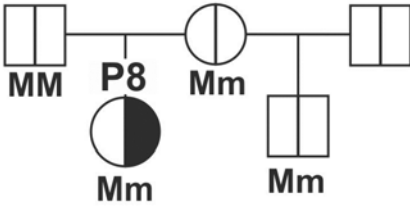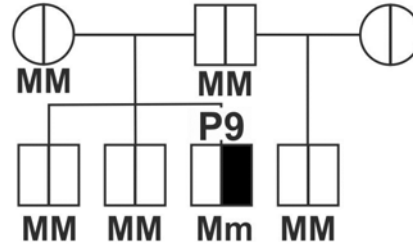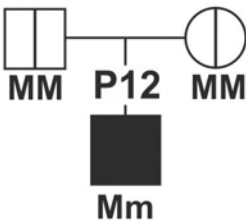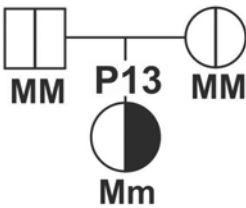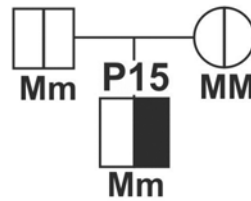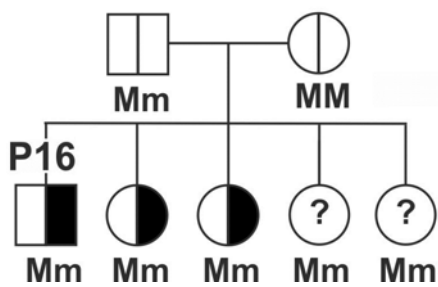

**Supplemental Figure 1: Additional pedigrees of analyzed families**

Phenotypes: left area black: RUS; right area black: congenital amegakaryocytic thrombocytopenia / congenital aplastic anemia (with amelioration: gray); ?: unknown phenotype; Genotypes: M - wildtype allele, m - mutated allele

## References

1. Bluteau O, Sebert M, Leblanc T, et al. A landscape of germline mutations in a cohort of inherited bone marrow failure patients. *Blood*. 2017.
2. Niihori T, Ouchi-Uchiyama M, Sasahara Y, et al. Mutations in MECOM, Encoding Oncoprotein EVI1, Cause Radioulnar Synostosis with Amegakaryocytic Thrombocytopenia. *Am J Hum Genet*. 2015;97(6):848-854.
3. Lord SV, Jimenez JE, Kroeger ZA, et al. A MECOM variant in an African American child with radioulnar synostosis and thrombocytopenia. *Clinical Dysmorphology*. 2017.
4. Ripperger T, Hofmann W, Koch JC, et al. MDS1 and EVI1 complex locus (MECOM): a novel candidate gene for hereditary hematological malignancies. *Haematologica*. 2017.
5. Richards S, Aziz N, Bale S, et al. Standards and guidelines for the interpretation of sequence variants: a joint consensus recommendation of the American College of Medical Genetics and Genomics and the Association for Molecular Pathology. *Genet Med*. 2015;17(5):405-424.
6. Kleinberger J, Maloney KA, Pollin TI, Jeng LJ. An openly available online tool for implementing the ACMG/AMP standards and guidelines for the interpretation of sequence variants. *Genet Med*. 2016;18(11):1165.
